# Supplementary material for: Encapsulation-free controlled release: Electrostatic adsorption eliminates the need for protein encapsulation in PLGA nanoparticles
Source: PubMed Central journal article supplement — Sci Adv. 2016 May 27;2(5):e1600519. doi: 10.1126/sciadv.1600519 (PMC4928928; doi:10.1126/sciadv.1600519), 2016-05-27
Supplement: 1600519_SM.pdf [file 1600519_SM.pdf]

## Supplementary Materials for

### **Encapsulation-free controlled release: Electrostatic adsorption eliminates the need for protein encapsulation in PLGA nanoparticles**

Malgosia M. Pakulska, Irja Elliott Donaghue, Jaclyn M. Obermeyer, Anup Tuladhar, Christopher K. McLaughlin, Tyler N. Shendruk, Molly S. Shoichet

Published 27 May 2016, *Sci. Adv.* **2**, e1600519 (2016)  
DOI: 10.1126/sciadv.1600519

#### **This PDF file includes:**

- fig. S1. Release of NT-3 from a PLGA np/hydrogel DDS containing encapsulated NT-3 and soluble NT-3.
- fig. S2. Bioactivity of proteins released from hydrogels with embedded PLGA np.
- fig. S3. Characteristics of PLGA np used in this study.
- fig. S4. Swelling of HAMC hydrogel with and without PLGA np.
- fig. S5. Release of soluble SDF from XMC alone into aCSF at pH 3, pH 5, or pH 7.
- fig. S6. Mass loss of PLGA from the release system at pH 3 and pH 7.
- Legend for movies S1
- Calculation of the relative surface area for PLGA np of different sizes
- Calculation for maximum surface coverage

**Other Supplementary Material for this manuscript includes the following:**  
(available at [advances.sciencemag.org/cgi/content/full/2/5/e1600519/DC1](http://advances.sciencemag.org/cgi/content/full/2/5/e1600519/DC1))

- movie S1 (.avi format). Two-dimensional Monte Carlo simulations of protein release from a hydrogel with embedded cubic degrading nanoparticles.

## Supplementary Materials

### Supplementary Figures

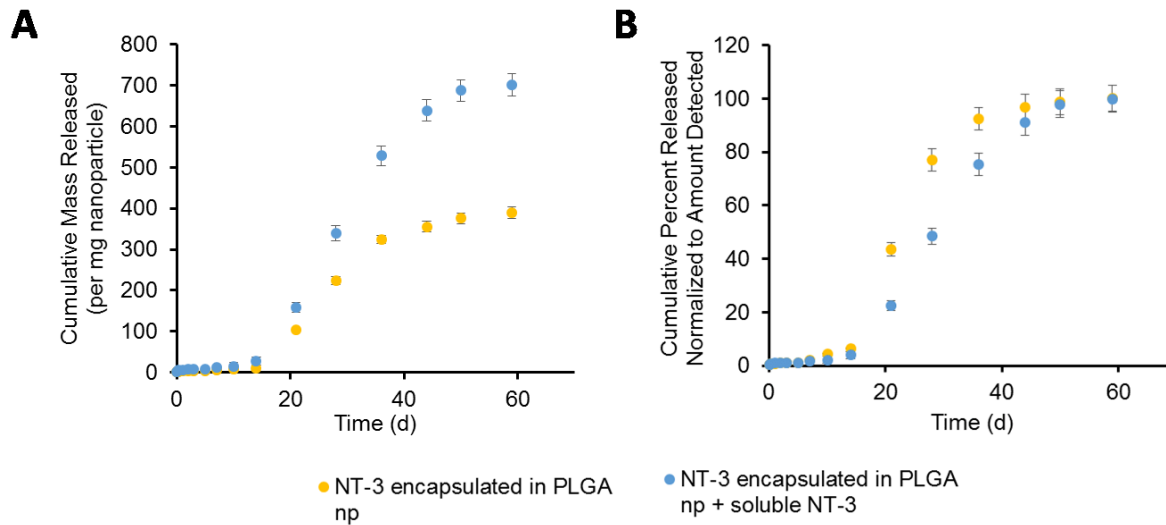

**fig. S1. Release of NT-3 from a PLGA np/hydrogel DDS containing encapsulated NT-3 and soluble NT-3.** (A) Addition of soluble NT-3 increases the cumulative mass of NT-3 released from the PLGA np/hydrogel DDS, but not (B) the cumulative percent release. The release profile remains largely unchanged ( $n = 3$ , mean  $\pm$  standard deviation plotted). Data for “NT-3 encapsulated in PLGA np + soluble NT-3” was reproduced from (17) with permission from the Royal Society of Chemistry.

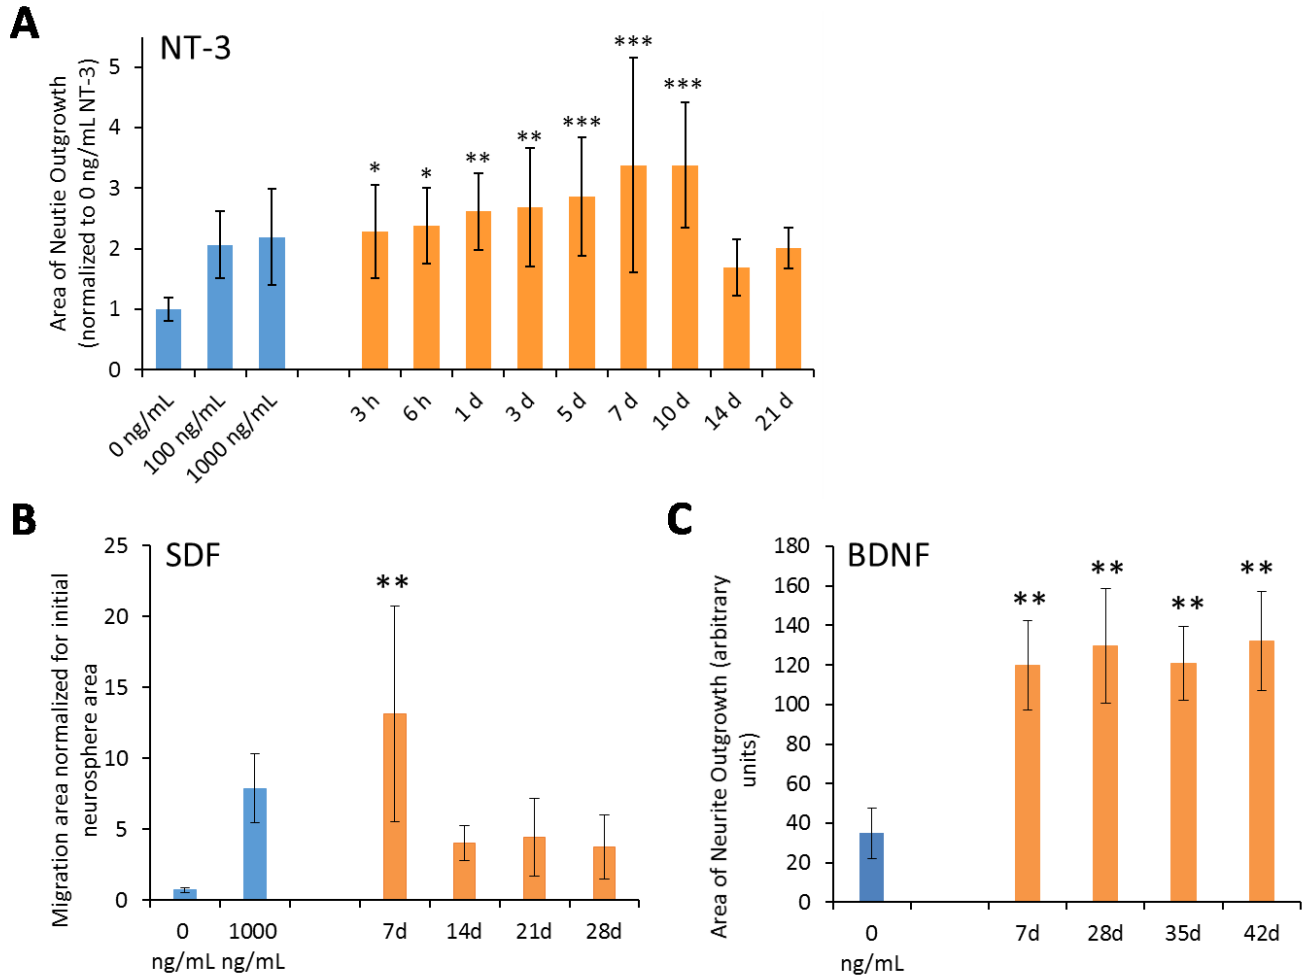

**fig. S2. Bioactivity of proteins released from hydrogels with embedded PLGA np. (A)** Activity of released NT-3 was assessed using a DRG neurite outgrowth assay. Released NT-3 elicits significantly increased neurite outgrowth for up to 10 days compared to a 0 ng/mL control, with a trend towards increased outgrowth for 21 days ( $n = 3$ , mean  $\pm$  standard deviation plotted). **(B)** SDF activity was assessed using a neurosphere migration assay. Released SDF caused significantly higher neural stem/progenitor cell migration for up to 7 days compared to a 0 ng/mL control, with a trend towards increased migration for 28 days ( $n = 5$  independent releases, mean  $\pm$  standard deviation plotted). **(C)** Activity of released BDNF was assessed using a DRG neurite outgrowth assay. Released BDNF elicits significantly increased neurite outgrowth for 42 days compared to a 0 ng/mL control ( $n = 3$ , mean  $\pm$  standard deviation plotted). (\*  $p < 0.05$ , \*\*  $p < 0.01$ , \*\*\*  $p < 0.001$ ).

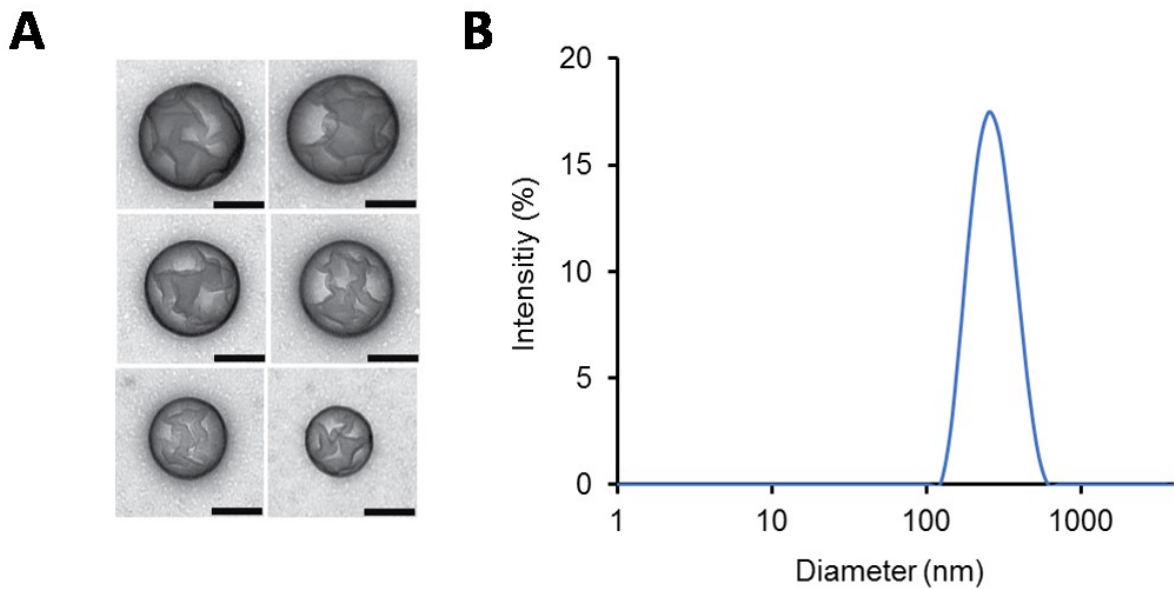

**fig. S3. Characteristics of PLGA np used in this study.** (A) Representative TEM images of PLGA np stained with uranyl acetate. Scale bar is 100 nm. (B) Representative dynamic light scattering trace. Nanoparticles have an average diameter of  $\sim 300$  nm with a PDI of  $\sim 0.2$ .

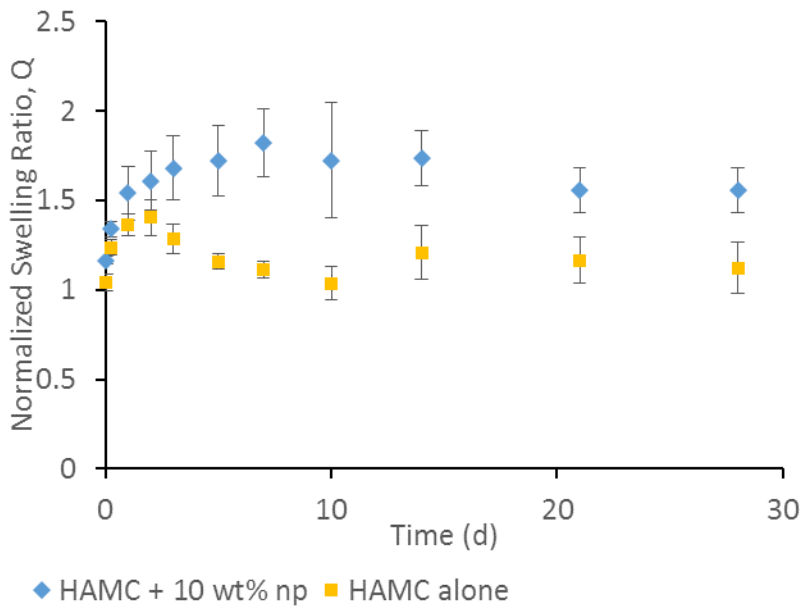

**fig. S4. Swelling of HAMC hydrogel with and without PLGA np.** HAMC with 10 wt% PLGA np has a significantly higher swelling ratio than HAMC alone between 3 and 28 days ( $p < 0.05$ ,  $n = 3$ , mean  $\pm$  standard deviation plotted).

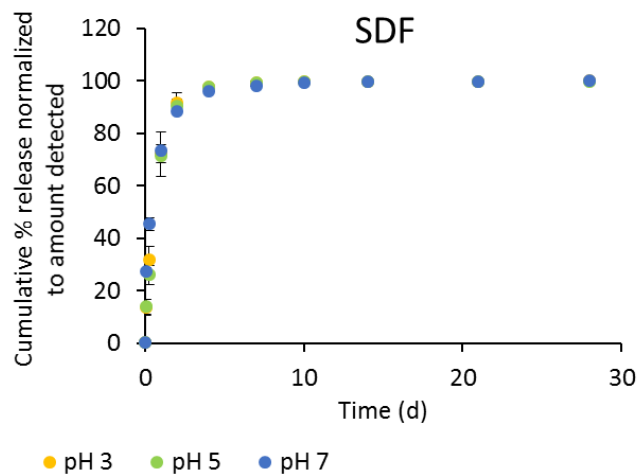

**fig. S5. Release of soluble SDF from XMC alone into aCSF at pH 3, pH 5, or pH 7.** Release results indicate no effect of varying pH on protein detection by ELISA ( $n = 3$ , mean  $\pm$  standard deviation plotted).

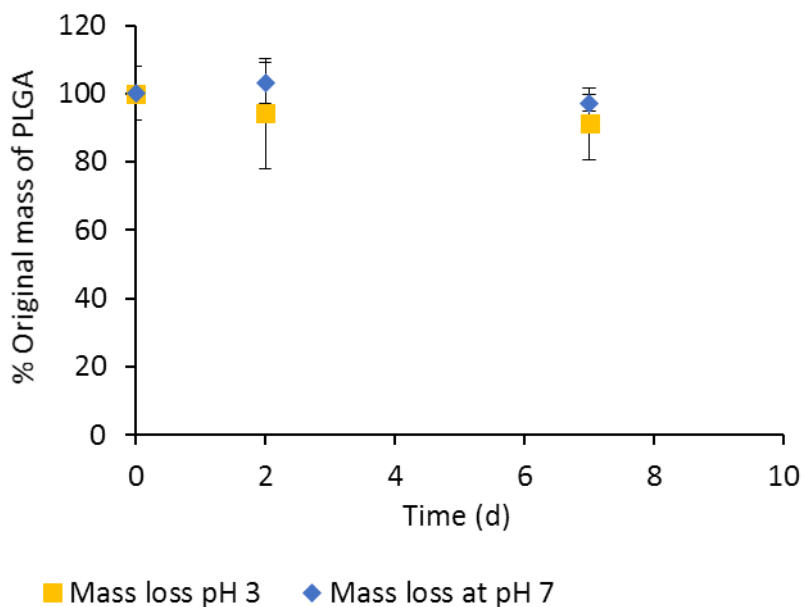

**fig. S6. Mass loss of PLGA from the release system at pH 3 and pH 7.** There is no significant mass loss of PLGA from the hydrogel over the first 7 days of release, regardless of pH ( $p > 0.05$  at all timepoints,  $n = 3$ , mean  $\pm$  standard deviation plotted).

**movie S1. Two-dimensional Monte Carlo simulations of protein release from a hydrogel with embedded cubic degrading nanoparticles.** (A to C) 2D simulations corresponding to the same fraction of occupied Monte Carlo lattice points as select 3D cases presented in Fig. 4B, i: (A) 0%wt, (B) 1%wt, and (C) 10%wt. The initial average protein concentration is  $\langle n_0 \rangle$ . The initial barrier to adhesion is  $\epsilon_0=1.0$  and the attractive well is  $u_0=-10.0$ . These potential energies decay following the logistic-population growth of nanoparticle degradation products, which increase with a growth rate  $r_0=0.001$  and have a carrying capacity per unit area  $K=1.4$ . The maximum concentration shown (red) is the initial maximum and any greater concentrations, common on the surface of nanoparticles, are not differentiated. (D) The cumulative percent of protein released as a function of time. It is important to note that these release profiles will not correspond to those in Fig. 4B, i since these simulations are in 2D not 3D and are simply meant to help visualize the simulation scheme.

### Calculation of the relative surface area for PLGA np of different sizes

Assuming spherical nanoparticles, the mass of nanoparticles within the gel is given by

$$m = \rho N \frac{4}{3} \pi r^3$$

where N is the total number of nanoparticles within the gel.

Given equal masses of two different nanoparticle populations where  $r_2=3r_1$  and assuming equal nanoparticle densities

$$\rho N_1 \frac{4}{3} \pi r_1^3 = \rho N_2 \frac{4}{3} \pi (3r_1)^3$$

So

$$N_1 = 27N_2$$

The total nanoparticle surface area within the gel is

$$N4\pi r^2$$

Therefore

$$S_1 = N_1 4\pi r_1^2$$

$$S_2 = \left(\frac{N_1}{27}\right) 4\pi(3r_1)^2$$

$$S_2 = \frac{9}{27} S_1 = \frac{S_1}{3}$$

So for a nanoparticle 3 times the radius, we obtain three times less surface area for the same mass.

### Calculation for maximum surface coverage

These calculations are done using SDF (MW ~ 8000 Da) as an example. Assuming a spherical (globular) protein with hydrodynamic radius of approximately 2 nm and a nanoparticle radius of approximately 150 nm (based on our DLS measurements in fig. S2), we have

$$A_{protein} = \pi(2)^2 = 12.57 \text{ nm}^2$$

$$SA_{particle} = 4\pi(150\text{nm})^2 = 2.83 \times 10^5 \text{ nm}^2$$

This means there would be approximately

$$\frac{2.83 \times 10^5 \text{ nm}^2}{12.57 \text{ nm}^2} = 22513$$

proteins per nanoparticle given complete surface coverage.

The mass of this number of proteins is

$$m_{protein} = \frac{22513 \times MW}{N_A} = \frac{22513 \left(8000 \frac{g}{mol}\right)}{6.02 \times 10^{23}} = 2.99 \times 10^{-16} g$$

The mass of a nanoparticle is

$$m_{particle} = \frac{4}{3}\pi r^3 \rho = \frac{4}{3}\pi(0.000015cm)^3 \left(1.5 \frac{g}{cm^3}\right) = 2.12 \times 10^{-14}g$$

Assuming a density of 1.5 g/cm<sup>3</sup> (30). So the ratio of protein to polymer by mass that gives 100% coverage is

$$\frac{2.99 \times 10^{-16}g}{2.12 \times 10^{-14}g} \times 100\% = 1.41\%$$
